# Supplementary material for: Complete Genome Sequence of Vallota Mosaic Virus Detected In A Narcissus Bulb Imported From The United States to Japan
Source: Research Square preprint supplement (doi:10.21203/rs.3.rs-1112838/v1), 2021-12-01
Supplement: Supplementary file 1 [file efaeb5c17f6f8b7770c6999d.docx]

>vallota mosaic virus-Nar (accession number LC658681)

ACAGGAACACTCAACAAAACTAAAACTCTCAAATTTCAGACTCTCGTTTTTGAACACTCAAACGAACTTAGTCTTTGAAACTTCGGATTTTAGAATTTCCAAAACTTTCATTCTCAACACACTAGCTCAAGGAAATGGCAATCAACTCGAACTGCGTTGGGTTCACATTCAATGTTGGATCGTTTACTGTTGATGCTTCCAAGAATGGGATTCATGACCCAATAGTTTGCATTGAGTCGCCATGCGGCGAACTCAGAATTGGTCAGCAGCTGGTTGCTGACTATGAAATGAATATTGCCAAGGCTTTTGGCAGTATTCCCTGCTTTGATGTGGTGCTACCACCAAGAAAACTGAAGGTAACAGCTCCAACTAAGAAGCTGCGCAAGAGGGGCAGGATGTATAAGATGTCTTTGGAGATTGAGACGCAGATAGTGGAGACAATCTGCAATCCTGAAACTCCACGCTTCCAGGTTGACATGACACCTGGAATTAAAGTCGCGACTTCTGTTAAGAAACCAAGAAAAGAGCAACCGAAGAAACTGATGAAGCCACAGGCAACAATTGATGCGATAATTCAGCAACTCTTTTCGATTGGTCGGAAAGGGGCGTTGACTATTGAAATTGTTGGCAAGAAAGCCTTCAAAGTCCAACACAAAAAGACTCGTTTTGGAACGCGCATGTTTGCACATGTACAACATTCATTGCACAAGATAAGGCGAGTGGACTGTACAATGGATCGATTTGCACACAAAGTGACGAATATGATCCTTTCAACTCAGGGTAAGCAGGACTTTGTATCAACAGAGGAATTAACTTATGGGGACAGTGGCATGATCCTTAAAAAGAAACGTATCCATGGAAGGTTCATTTCAACTGAAGATACAGACATCTTAATTGTGCGCGGAAGGCATGAATATGGCATCGTAGATGCGACAATTCAGATGGCGATGAGGGAAGCAAAGAAAGTTTGGCATTATTCTTTGGGAAGCCAGTATTTCAACGCCTTTAGCGACGAATTTGTGAAACATCAGCGAGTCGCGCATGAAGGTCAATGTACACGCGACATACCGATTTCGGTAGTTGCAAAAACGCATGCACAATTACTGCAAATGGTTTTCCCTTGTGGAAAAATAACTTGCTATAAGTGCATGCAAGAGATTGCAAAGACTGATGAGCTTGGCTGGATCAAGAGGTTTGATGAAGGAAATGAGTTGATTGAGCAGGAATTGATGGATAATGAACAAATGCCACAAGCTCAAGCTCTCATCAGATTCTTTCGAGCGAGAAGGGAAGCTAAGAAGCTTAACATTAATGCGAGCTTAGAAATCACTCGACTGGTAAATGGTCGAGACGGGGAAATTTTTAGAATGCTTGGAAAACTGAATGACGCATTGCTTCGCACCAGTTGTGGGGATGGTTCATCCTTTGGATTAGCGTTCAGTGCGCTACTCGAAGTGACTCGCTGGTGTAAGAATAGATCGGATATCAATCAATCAGGGAGTTTACAGAATTTCCGAAACAGGATTTCTGGAAAATCACATATTAATGTAGCGCTTATGTGTGATAATCAGCTTGATCAAAACGGAAACTTTCTATGGGGAAAGAGGGGATATCATGCGAAGCGGTTTTTCGCCAACTATTTTGAAAAGGTTGATCCGCTGAATGGGTACGAAAAACACAAGACCAGAAAGAATCCAAATGGCAAGCGTGAGCTAGCAATTGGAAATTTGATCGTATCCACAAACTTTGAAGTATTACGCAAGCAGTTAAAAGGTAATCTTGTTACACAAGTGCCATTAAGCGAATCGTGCATCAGTAGACTGAATGGCAACTTTCTTTACAATTGCTGCTGTGCTACTTTAGAAGACGGAAAGCCACATATGTCTGATTTAAAAATTCCAACGAGAAACCATCTTGTTATTGGCAACACTGGAGATGCCAAGTATGTGGACTTGCCGACGCAGGAGGAGGAGAATCTATTGATTGCTAAGGAAGGATACTGTTATGTTAACATCTTCTTGGCTATGCTAGTTAACGTGAGCGAAAATGATGCCAAGGACTTCACGAAGAAGATGGTTAGAGATTTAATCATTCCAAAGCTTGGTAAGTGGCCCAAGCTCATTGATGTTGCAACAGCGTGTCACCTGCTCAGCGTCTTTTATCCAGACACGCGCAATGCCGAGTTACCAAGAATTTTGGTAGACCATTCGAACAAGACAATGCATGTGATTGATTCATATGGATCCCTGGACACAGGTTTCCATACTTTGAAAGCTACGACCGTGAATCAATTGATCGGTTTTGCAAGTGAGGAGCTGCAATCAGAAATGAAAAATTACTATGTAGGTGGAACTACATCGCCAACGACAGCGTGGGATTTGAGTAAACTACTGATACGCGGGATCTATCGTCCACACATGATGCAGCAGATTTTATTGGACGAGCCTTGTATACTCGCATTAGCAATCTTATCTCCGAGTGTACTGATTGCATTATTTAATAGTGGATCATTGGATCGAGCAGCTAGCATTTGGATGGGGAAACAGGATTCAATCGTACGAATGGTTGCGATACTTGAAATGTTAACAAAGAAGGTTTCAACTTCAAGGTTATTAGTTGAACAAAGGCAAGTACTTGAAATGCATGCACGCCCTGTATTTGAAGAAGTCTTCTCTGGATTTAAAATTCAGGCATCGTACAATCTGGTATTAGACGCTTTACAAGTTGTGATTGCCATGCAAGAAGCTGATGAACGTCTCACACACTTTGGCTTCCTGACGCACGATATGAGAACAATTGAAATTTTCGAAAAAAATTATCAAATCGAATTACAGGCGTCGTGGAACGATTTAAGCTGGCGGGAGAAATTCTCTACAAGCTGGTCTTGGTCAAGAGCACAATACAAATTAAAGGTATCATACAACCCAATCGACCAAGGCGTTTCAAAAGGCGTTTGTGCCAAATCACTGCAGCAATATGTGGGATGTGCGAAGGAGAAGTCATTGCTAATTCGAGATGGTTGCTTGTTTAAAATCAAACTTTTCCTCAGAAGAGCACGGGTTGGGTGTGCGCGCGTGTTGTTTAGCATTGTTCGCGCAAGTTTACCAGACTTATTAAAGGCAGTCAACCTTTTAATGATTGTTGCAATTTTACTCGGTATCATCAACCAAGTGTATGAATGGTTATTAATACACCAGAGATATAAGAGGACAAAGATTCTGGAGCGAAATGCACAACTTGATGAAATGATCTCAACTGTATACGAATCAATGTGCAAGGACGCTGAACGACCAACAGAGAGCGAATTTGAGGATAAATTAAGCTCCTTGGGTATTGACGTGAAGAACAGGTATGATTTTGCATGGAAAGGTTACGCTCTTGTTAAATTTCAAGCGAAGAATGCAAAGGAATGTCAACTTGAACAAATAATAGCGTTCATGACTCTTCTCTCAATGCTTTACAGTCCTGAAAGGAGTGATTGCCTTTTTAAAGCATTAAATAAAGTAAAGGGTGTGCTTGGTACAATCGAGAATGACGTGTACCATCAAGTGGATGATATACAAGACATAATGGAGGAGAAAGAAGCAACAGTTGATTTTGTCCTGGAAGGAGATAAACAAATCACACACACCACTTTTGATGTGACCTTCAACGACTGGTGGCAGAATCAACTCAACACAAACCATGTGGTAGCACACTATCGAGTTGGTGGAGCGTTCCTTGAATTTACACGATCCACGTGCGTGGCTGTCTGCAACAAAGTCAATACCATGGCGCACAGTGAATTCCTTATTCGGGGAGGTGTTGGGTCTGGGAAATCAACAGGTTTGCCTTTTTACTTGTCACGACGAGGCAATGTTTTAATAATAGAACCAACACGCCCATTGGCTGAGAATGTGTGCAAACAGCTTCGAGGAGAACCGTTTCTTGTAAATCCGACACTGCGTATGCGTGGGTTAGTATCTTGTGGTTCAGCACCAATCGATGTTATGACAAGCGGGTATGCTCTCCATTACCTTGCCAACGCCAGATCGTTGATTAATTCATATTCATACATAATTTTTGATGAATGTCATGTCTTGGACAGCTCGGCGATGGCTTTCTACAGTCTACTCAAAGATCACAGCTATACGGGAAAAGTGCTTAAAGTTTCAGCAACTCCACCGGGACGAGAGACCGAATTCGAAGCAATGAACACAGTCACGTTCAACACAGAGGATTCCCTTTCATTTGATTCATTTGTGAGGCAACAAGGCAGTGGTAGCAACGCAGACGTGGTGAATAAAGGAGATAGCATTTTGGTTTACGTGGCCAGCTACAACGAAGTTGATCAATTAAGTAAACTATTAGCGGACAAAGGTTATCTTGTGACAAAAGTCGACGGACGAACAATGAAGGTTGGTAATGTTGAAATCATAACACAAGGAACTGCAACACGGAAACATTTCATAGTGGCCACAAACATTATTGAGAATGGAGTAACACTGGATATTGATGTAGTCGTTGATTTTGGTACTAAGGTTGTTGCTGACTTGGATATAGATAATAGAATGATGCAATATAGGAAGGTTAGCGTAACATATGGGGAGAGGATTCAACGAATTGGAAGAGTCGGACGTGTAAAGAATGGACACGCCTTGCGTATTGGTCACACAGAGAAGGGATTGGCAGAAATACCTGTAGGGCTTGCAACGGAAGCAGCATTTCTTTGTTTCGTTTATGGTTTACCAGTTATGACGCACAATGTTACAACAAGCTTGCTGGGACGTTGCACAAGGAAACAGGCAAGAACAATGATGCACTTTGAACTGCCTCCATATTTCACGGTCAATCTTGTTGGATTCAATGGTACGATGCATCCTAAGATACATGATATACTGAAGGCGTATAAATTGCGCGATAGCGAGATCACGCTTAGTCCATTGGCAATTCCGCACAAATTGGTAGACACATGGATCACTGCTTCACAATATGTTATGATGGGAGCGCGCATCGCTCTTGATGAAGGTTGTAGGATTCCGTTTTATGTTAAAGATTTGCCAGATAAAGTCTACAATTCAATTTGGAGGGCAGTTATTGAGCATAGAAGTGACGCTGGTTTTGGGAGACTAACGACACACAGCGCAGTGAAGATTGCATACACACTGGAAACAGATGTGGTGGCAATACCACGAACAATTGCGATCATTGATGCGTTAATTGAGCAAGAGCAGGTGAAGCAAGCACACTTTAAGACACTACAAATGCAGAGTTGTACAGCGGGAGCGTTTACATTGGCTTCAATTGCAAATACTATACGCTCAAAATATGCTGTAGACCACACGAGCGAAAATATTGAAGTCCTTCAGAGGGCACGAGCGCAGTTATTGGAATTCTCAGGGATTGAAAAGAGTCCTCAGTATGCTGATGTCATGAGGAATTATGGAGTCCTAAACTTAGTGAAACACCAGAGCGCTGGAAGCATATCAAAGGAGCTCAAACTGCAGGGTCGATGGAATGGGAAACTGTTAACAAGAGACATCTTCGTTAATGGTTGTTTGCTTGGAGGCGGAATTTGGTTAATCTGGAAGTACTTTTCGGGGAAATTTAATGAAGACGTGATCCACCAAGGAATGGGTAAGCGGCAAAGGCAAAAATTACGCTTTAGAGACACAGCCGTGGGCAAATTAGGTCGCGAAGTATATGCAGACGACAATACAATCGAGCATTTCTTTGGCGAGGCCTATACAAAGAAGGGCAAATCAAAGGGAAGACACGCAACACGCGGGATGGGCACGAAAACACGCCATTTTATGAATATTTATGGATTCGATCCATCCGAATACGCCATTGTACGGTATGTCGATCCATTGACTGGAGCAACACAAGATGAGAACCCATTATTGGCGATTGACCTTGTCCAAGAACGCTTCGCAGACATCCGAAGGAAGATGATTGAAGAGGATGAGTTGGATCCACAAACTGTTCTGTCACAACCAGGGATTCAAGCATACTATTTGAAAGCGCGCACTGGAGCTGCTCTTAAGATAGATCTAACGCCACATAATCCACTTTTGGTTTGTAAATCAAACAATATAGCAGGCTTTCCAGAGCACGAATTTGTGCTGCGACAGACAGGAAAAGCTATAACGGTAAAAGCTGAAGAAGTGCCACAAGAAAACTCGAGCTTCGAGGAAGATGTTTCGCACGAAGCTAAAACATTGAACAGAGGACTGCGCGATTATAACCCGATTTCGTCAGTTATTTGTCGTCTCACAAATGAAACGGATGGCCATAACTTCACTCTTTTCGGTGTGGGCTTTGGAGGTTGCATTATTACGAATCGGCATCTATTTAAACTCAATAATGGAAGTCTGAGAGTTCAGTCGCAACATGGTGAATTTTTCATTAAGAATGCAACGCAACTTAAGATGTTGCCTGTTGGAAAAACAGATCTGTTGATAATCCAGATGCCGAAAGACTTTCCAGTCATGCCAAAGCGTTTGCGGTTCAGAACACCAAAGACTACAGATAAAGTCTGCTTAATTGCAACAAATTTCCAAGAGAAATTTGTGTCAAGCCTTGTATCCGAAGATAGTTCAATTTATCCTGTTGGGGGAGGAGATTTCTGGCAGCATTGGATCACGACGAAGGACGGACACTGTGGGTTGCCTCTCGTTTCAACACGTGATGGAGTCCTCTTGGGACTACATAGTTTGGCAACGGTTAGCAATTCGAAGAATTTCTTCGCTGCCTTTCCTGAAAACTTCGAAACGGAATATTTAGAAAAACTAGAGTTGAAAGAATGGACCACGAAGTGGAAATACAACGCAAATGAAGTTTGTTGGGGAGGTCTCAAGCTTCAGCAAGACAAAGCAGATGGGATTTTCAATACGACAAAAGGAATCGCACAATTATTCGAGGATCTCGTTTATGAACAAAATGCATCTGACCGTTGGATGTTCCAGGAACTGAAAGGAAACTTGAAAGCTGTTGCATACACACCAAATCAGCTTGTCACAAAGCACGTAGTGAAAGGGCCTTGTTTAACATTCGTGAAATACTTGAGCGAAAATGTTGAAGCTTTCCAGTATTTTCAGCCATTGATGGGGTTTTATCAAAAGAGCAAACTCAATAAAGCAGCATTTGTGAAAGACATAATGAAGTACAGCCAGCCTATTACTTTGGGGGAAGTGAATGTGGAGTGTTTTGAAGCTGGATTTAACAACGTAAAGAGACTATTTGAGAAAATTAGCTTCGAAAAGTGTGAGTATATCACTGACCCTGACATAATTTACAATAGCCTCAATCTCAAAGCAGCTGTTGGAGCCTTGTACACAGGAAAGAAGAAGGATTATTTTGCTGGCATGGAACTATCACAAGTAGATGCGCTTATACGTGCTAGTTGTTTTCGACTGTACCAAGGTAAATTTGGGATTTGGAATGGCTCTTTGAAAGCTGAGCTAAGACCATTGGAAAAAGTCTTGGCAAATAAAACACGCACATTTACAGCAGCGCCTTTGGACACGTTACTTGGAGCTAAAGTGTGTGTTGATGACTTCAATGCACAGTTTTACAGTAAACATCTCGAAGGGTTTTGGACTGTGGGCATTTGCAAGTTCTATAAAGGCTGGGATCGATTTATGACTGAGTTACCAGATGGTTGGCTATATTGTGACGCAGACGGATCGCAATTTGATAGTTCCTTAACTCCATATTTACTAAATGCAGTGTTGAGGTTGCGCCTAGAATACATGGAGGATTGGTCGATAGGGGAAGAGATGCTCAGGAACCTGTACACGGAAATAATTTACACACCGATCGCTACACCAGATGGAACTATTGTGAAAAAGTTTCGAGGGAACAACAGTGGACAACCATCTACGGTAGTTGATAATACGCTGATGGTTATCCTAACCATGCAATATGCACTAGCCAAGCAGGATATTGGTTTCCAGGAACAAGAGGATATAATACGATATTTTGCCAATGGAGATGACTTATTGATTGCAGTGAATGGAGATAAGGGAATCGCTTTATTAAACACGCTGCAAGAATCATTCAGTGAGATGGGGTTGAATTATGACTTTAACGATCGTACTCACAATAAAAGCGAACTTAGTTTTATGTCTCACCAAGCGCTCGAATATGATGGTATGTATATACCAAAAATTAAGAAGGAGAGAATAGTCTCAATTTTGGAATGGGATAGGAGTGTGGAGCCAGAGCACAGAATGGAAGCTATTTGTGCCGCAATGGTTGAGGCATGGGGATATCCAGAACTATTACATGAGATCCGTAAGTTCTATGCATACATGTTGGATCAGGAGCCTTTCTCAGAATTGAATGCACAGGGTAGAGCGCATTACATATCAGAACAAGCTTTGAAGACGCTGTACATGGACGGCAAAGTAACTTTACTGGACATTGAACCATATCTTCAAGAGATAGCACATCTGAGCTTGGTAGATTTGGATGAGATGGTCTACCATCAGGCGGACAAAACGATAGATGCTGGCACCTCTACTTCTCAATCAGATCGAGCGCCACAGGTGGATCGAGACATAAACGCAGGCACTTTCGTCATTCCTCGCATTAAAGCACTAGGTGGGAAGATGGCGCTCCCAAAGGTGCGAGGGAAAAATGTGATTAATCTACAACATCTCCTCAATTATTCCCCAGAACAGACTGATATTTCGAACACGCGTGCAACCCACAAACAATTTGCAACGTGGTATGATCGTGTCATGGAGAGTTATGGAGTGACTGATGCACAAATGGAAATTATTTTAAATGGGCTTATGGTTTGGTGTATTGAAAATGGAACTTCACCGAACTTGAGCGGAATGTGGACGATGATGGATAAAGATGAACAAGTTGAGTATCCATTGAAACCGATCTTAGAAAATGCGCAACCCACATTTAGACAAATCATGGCGCATTTTAGTAACGCAGCCGAAGCTTACATCGAAAAGAGAAATTCGGAAAGAAGGTATATGCCAAGGTTTGGCAGCCAACGTAATCTAACAGACTACAGCTTAGCACGCTATGCTTTCGATTTCTATGAAATAACTTCGCACACACCAGTGCGAGCAAGGGAAGCACACATCCAAATGAAAGCGGCGGCTCTTCGAAACACCAAAACGAGGATGTTTGGATTAGATGGAAAAGTTGGGACCGAGGAAGAGGACACGGAACGGCATGTGACGACAGATGTCAATCGGAACATGCATTCACTGTTAGGTGTTAACATGTGATTTAGTGAAGCAGGTATTTTACTTAATATCTATATTTGCCCGTCAGCATCCTTTTCTTTTGCTTTAATGTATTAGCGTTTCAGTAAAGGTGATCCAGTTATTTCGTATGATTAACTGGAGTGACTTTGTTGTGAACACACATATGTTTTAGTCGAACTGGAATGAGTTGTGTATGTGATTGAACTTGAGCTACATAACACATTGCAGCGAGAGAC
